# Supplementary material
Source: publisher figshare collection journal article supplement (https://asha.figshare.com/articles/dataset/_/25979704)
Supplement: Supplementary file 2 [file 1]

**Supplemental Material S4.** Exploratory interaction model of dosage with baseline DSE performance.

| <i>Predictors</i>            | Understand and Sign |           |          | Imitate   |           |          | Use Spontaneously |           |          |
|------------------------------|---------------------|-----------|----------|-----------|-----------|----------|-------------------|-----------|----------|
|                              | <i>OR</i>           | <i>CI</i> | <i>p</i> | <i>OR</i> | <i>CI</i> | <i>p</i> | <i>OR</i>         | <i>CI</i> | <i>p</i> |
| High dose (vs low dose)      | 0.60                | 0.31–1.14 | .118     | 0.96      | 0.55–1.68 | .897     | 1.05              | 0.60–1.81 | .874     |
| Baseline                     | 1.07                | 1.04–1.09 | < .001   | 1.19      | 1.14–1.25 | < .001   | 1.26              | 1.20–1.33 | < .001   |
| Group × Baseline interaction | 1.09                | 1.03–1.15 | .004     | 1.05      | 0.96–1.14 | .331     | 0.99              | 0.91–1.08 | .839     |
| Observations                 | 50                  |           |          | 50        |           |          | 50                |           |          |
| R <sup>2</sup>               | 0.523               |           |          | 0.518     |           |          | 0.514             |           |          |
| AIC                          | -164.406            |           |          | -299.613  |           |          | -325.521          |           |          |
