# Supplementary material
Source: publisher figshare collection journal article supplement (https://asha.figshare.com/articles/dataset/_/25979704)
Supplement: Supplementary file 3 [file 1]

**Supplemental Material S1.** Scoping questionnaire.

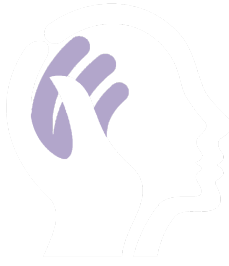

## Parent/Guardian Consent Form

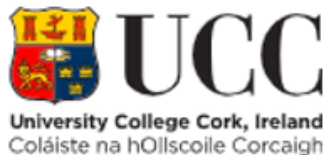

**University College Cork**  
Coláiste na hOllscoile Corcaigh

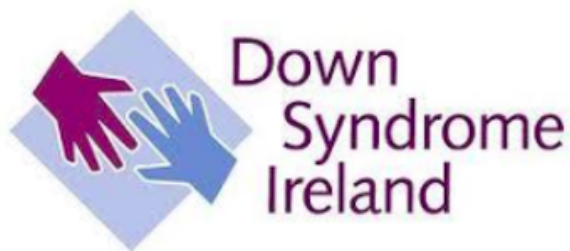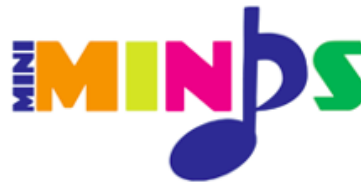

Parent/Guardian Consent Form

Feasibility of an online study language programme delivered through music for young children with Down Syndrome

The survey is anonymous and should take between 5 and 10 minutes to complete.

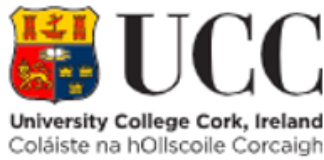

**University College Cork**  
Coláiste na hOllscoile Corcaigh

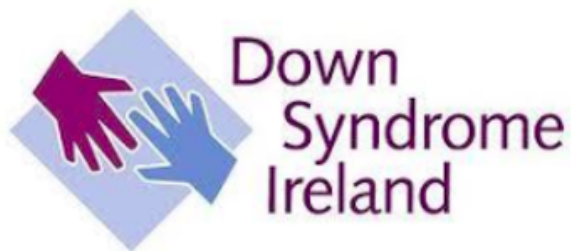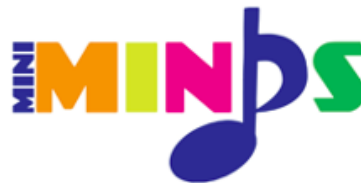

Parent/Guardian Consent Form

Feasibility of an online study language programme delivered through music for young children with Down Syndrome

The survey is anonymous and should take between 5 and 10 minutes to complete.

I have read and understood the details of the above study, and have had the opportunity to ask questions and discuss the study with others. I have received satisfactory answers to my questions.

Yes  
☐

I understand that the project has received ethics clearance through the Social Research Ethics Committee University College Cork, and understand who will have access to the data, how it will be stored and what will happen to the data at the end of the study.

Yes  
☐

I understand that participation is voluntary and whether I decide to take part or not will not have a bearing on my involvement in the program or any other services available from Down Syndrome Ireland.

Yes  
☐

I understand how to raise concerns or make a complaint. I understand that I can withdraw from the study up until the end of the intervention at which point my data will be anonymised.

Yes  
☐

To find out more about the study, please read the attached information sheet. You can also e-mail us at [e.mcmullan@ucc.ie](mailto:e.mcmullan@ucc.ie) or [p.frizelle@ucc.ie](mailto:p.frizelle@ucc.ie)

Confirmation that my child is between 0 and 3 years

Yes  
☐

I am happy to take part in this survey

Yes  
☐

Date of Completion

|                | Month                | Day                  | Year                 |
|----------------|----------------------|----------------------|----------------------|
| Please Select: | <input type="text"/> | <input type="text"/> | <input type="text"/> |

**Survey**

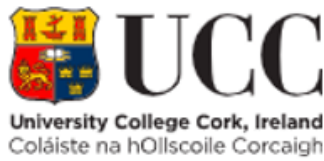

**University College Cork**  
Coláiste na hOllscoile Corcaigh

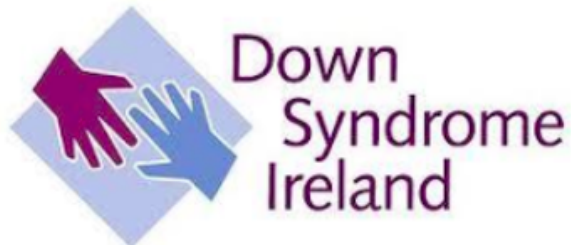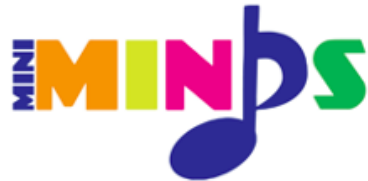

Feasibility of an online language programme delivered through music for young children with Down Syndrome

Language Through Music Survey

If you have attended any previous music sessions online, what did you think worked well?

If you have attended any previous music sessions online, what did you think did not work?

How did you access the sessions

- ☐ Desktop
- ☐ Laptop
- ☐ Tablet/Ipad
- ☐ Phone

If you were to attend music sessions online, would you be willing to attend

- ☐ Once a fortnight
- ☐ Once a week
- ☐ Twice a week
- ☐ Three times a week
- ☐ Other

If you answered 'Other' in the last question please specify your preference.

What do you think is a good session length for you and your child?

- ☐ 1 hour
- ☐ 40 minutes
- ☐ 30 minutes
- ☐ 15 minutes

If you were to combine possible options in relation to the two previous questions would your preference be

- ☐ 1 hours once a fortnight
- ☐ 40 minutes once a week
- ☐ 20 minutes 3 times a week
- ☐ 10 minutes 3 times a week
- ☐ A different combination not specified

If you answered 'A different combination' please specify your

preference

What time of the day would you like the sessions to be held?

- ☐ Morning
- ☐ Afternoon
- ☐ Evening
- ☐ Night

Do you work outside of the home? (it is helpful to have an understanding of your circumstances when interpreting your responses)

- ☐ Yes
- ☐ No

If yes please indicate whether it is full or part time

- ☐ Full time
- ☐ Part time

If you work part time please indicate how many hours per week



Are you the primary caregiver?

- ☐ Yes
- ☐ No

Please specify your relationship to your child?

- ☐ Mother
- ☐ Father
- ☐ Guardian

If you attended our previous music sessions what helped you to learn the signs of the songs you were introduced to? If you haven't attended previous sessions, what do you think would help?

If you attended our previous music sessions what helped you to remember to sing the songs during the week? If you haven't attended previous sessions, what do you think would help?

What helped or would help keep your child engaged in the session?

The survey is anonymous, if you would like to be part of the focus group to discuss how the language through music sessions might run (how often, for how long etc.) please email Nicola Hart at Down Syndrome Ireland  
[nicola@downsyndrome.ie](mailto:nicola@downsyndrome.ie)
