# Supplementary material
Source: publisher figshare collection journal article supplement (https://asha.figshare.com/articles/dataset/_/25979704)
Supplement: Supplementary file 4 [file 1]

**Supplemental Material S2.** Vocabulary list and corresponding dose for each song.

| Lesson 1                           |                            |                             |                                     |                            |                             |
|------------------------------------|----------------------------|-----------------------------|-------------------------------------|----------------------------|-----------------------------|
| Baby Shark                         |                            |                             | The Wheels on the Bus               |                            |                             |
| Vocabulary Item<br>( <i>n</i> = 5) | Total Number<br>(per song) | Total Number<br>(per video) | Vocabulary Item<br>( <i>n</i> = 15) | Total Number<br>(per song) | Total Number<br>(per video) |
| Baby                               | 8                          | 24                          | Bus                                 | 14                         | 42                          |
| Mommy                              | 4                          | 12                          | Day                                 | 7                          | 21                          |
| Daddy                              | 4                          | 12                          | Baby                                | 2                          | 6                           |
| Granny                             | 4                          | 12                          | Crying<br>(wa, wa, wa)              | 4                          | 12                          |
| Grandad                            | 4                          | 12                          | Mommy                               | 2                          | 6                           |
|                                    |                            |                             | Daddy                               | 2                          | 12                          |
|                                    |                            |                             | Sleep                               | 4                          | 6                           |
|                                    |                            |                             | Money                               | 4                          | 12                          |
|                                    |                            |                             | Please                              | 4                          | 12                          |
|                                    |                            |                             | Doors                               | 2                          | 12                          |
|                                    |                            |                             | Open                                | 4                          | 6                           |
|                                    |                            |                             | Close                               | 4                          | 12                          |
|                                    |                            |                             | People                              | 2                          | 12                          |
|                                    |                            |                             | Up                                  | 4                          | 6                           |
|                                    |                            |                             | Down                                | 4                          | 12                          |

| Lesson 2                            |                            |                             |                                     |                            |                             |
|-------------------------------------|----------------------------|-----------------------------|-------------------------------------|----------------------------|-----------------------------|
| Let's Go to the Zoo                 |                            |                             | Down in the Jungle                  |                            |                             |
| Vocabulary Item<br>( <i>n</i> = 15) | Total Number<br>(per song) | Total Number<br>(per video) | Vocabulary Item<br>( <i>n</i> = 12) | Total Number<br>(per song) | Total Number<br>(per video) |
| Go                                  | 14                         | 42                          | Down                                | 5                          | 15                          |
| Zoo                                 | 14                         | 42                          | Goes                                | 5                          | 15                          |
| Elephant                            | 2                          | 6                           | Little                              | 5                          | 15                          |
| Jump                                | 2                          | 6                           | Elephant                            | 1                          | 3                           |
| Rabbit                              | 2                          | 6                           | Washing                             | 10                         | 30                          |
| Sing                                | 2                          | 6                           | Clothes                             | 10                         | 30                          |
| Monkey                              | 2                          | 6                           | Here                                | 5                          | 15                          |
| Walk                                | 2                          | 6                           | There                               | 5                          | 15                          |
| Chicken                             | 2                          | 6                           | Lion                                | 1                          | 3                           |
| Slide                               | 2                          | 6                           | Monkey                              | 1                          | 3                           |
| Snake                               | 2                          | 6                           | Bird                                | 1                          | 3                           |
| Swim                                | 2                          | 6                           | Frog                                | 1                          | 3                           |
| Fish                                | 2                          | 6                           |                                     |                            |                             |
| Dance                               | 2                          | 6                           |                                     |                            |                             |
| Animals                             | 2                          | 6                           |                                     |                            |                             |

| Lesson 3                            |                            |                             |                                    |                            |                             |
|-------------------------------------|----------------------------|-----------------------------|------------------------------------|----------------------------|-----------------------------|
| This is the Way We                  |                            |                             | Goodnight Baby Shark               |                            |                             |
| Vocabulary Item<br>( <i>n</i> = 11) | Total Number<br>(per song) | Total Number<br>(per video) | Vocabulary Item<br>( <i>n</i> = 7) | Total Number<br>(per song) | Total Number<br>(per video) |
| Bath                                | 4                          | 12                          | Bath                               | 4                          | 12                          |
| Sleep                               | 7                          | 21                          | Brush Teeth                        | 4                          | 12                          |
| Wash                                | 4                          | 12                          | Go                                 | 4                          | 12                          |
| Hair                                | 4                          | 12                          | Bed                                | 4                          | 12                          |
| Dry                                 | 4                          | 12                          | Book                               | 4                          | 12                          |
| Nappy                               | 4                          | 12                          | Read                               | 4                          | 12                          |
| Brush Teeth                         | 4                          | 12                          | Sleep                              | 4                          | 12                          |
| Read                                | 4                          | 12                          |                                    |                            |                             |
| Book                                | 4                          | 12                          |                                    |                            |                             |
| Say                                 | 4                          | 12                          |                                    |                            |                             |
| Night, night                        | 4                          | 12                          |                                    |                            |                             |

| Lesson 4                            |                            |                             |                                     |                            |                             |
|-------------------------------------|----------------------------|-----------------------------|-------------------------------------|----------------------------|-----------------------------|
| Let's Go to the Shop                |                            |                             | Down by the Sea                     |                            |                             |
| Vocabulary Item<br>( <i>n</i> = 14) | Total Number<br>(per song) | Total Number<br>(per video) | Vocabulary Item<br>( <i>n</i> = 19) | Total Number<br>(per song) | Total Number<br>(per video) |
| Go                                  | 4                          | 12                          | Down                                | 4                          | 12                          |
| Bus                                 | 2                          | 6                           | Sea                                 | 4                          | 12                          |
| Food                                | 2                          | 6                           | Water                               | 1                          | 3                           |
| Shop                                | 2                          | 6                           | Small                               | 1                          | 3                           |
| Hungry                              | 2                          | 6                           | Children                            | 3                          | 9                           |
| Stop                                | 2                          | 6                           | Swim                                | 4                          | 12                          |
| Apple                               | 2                          | 6                           | Here                                | 4                          | 12                          |
| There                               | 4                          | 12                          | There                               | 4                          | 12                          |
| Look                                | 1                          | 3                           | Goes/Go                             | 1                          | 3                           |
| See                                 | 2                          | 6                           | Playing                             | 2                          | 6                           |
| Sweets                              | 2                          | 6                           | Wash/Washing                        | 4                          | 12                          |
| Me/I                                | 2                          | 6                           | Clean                               | 1                          | 3                           |
| Love                                | 3                          | 9                           | Eating                              | 2                          | 6                           |
| Please                              | 2                          | 6                           | Ice-Cream                           | 2                          | 6                           |
|                                     |                            |                             | Home                                | 2                          | 6                           |
|                                     |                            |                             | Mommy                               | 1                          | 3                           |
|                                     |                            |                             | Looking                             | 2                          | 6                           |
|                                     |                            |                             | Phone                               | 1                          | 3                           |
|                                     |                            |                             | Day                                 | 1                          | 3                           |

| Lesson 5                           |                            |                             |                                    |                            |                             |
|------------------------------------|----------------------------|-----------------------------|------------------------------------|----------------------------|-----------------------------|
| Can You Roll the Big Ball?         |                            |                             | Teddy Bear is Quiet                |                            |                             |
| Vocabulary Item<br>( <i>n</i> = 8) | Total Number<br>(per song) | Total Number<br>(per video) | Vocabulary Item<br>( <i>n</i> = 9) | Total Number<br>(per song) | Total Number<br>(per video) |
| Come                               | 18                         | 54                          | Teddy Bear                         | 12                         | 36                          |
| Roll                               | 26                         | 78                          | Quiet                              | 12                         | 36                          |
| Big                                | 18                         | 54                          | You                                | 4                          | 12                          |
| Ball                               | 18                         | 54                          | What                               | 4                          | 12                          |
| Daddy                              | 2                          | 6                           | Do                                 | 4                          | 12                          |
| Mommy                              | 2                          | 6                           | Jump                               | 5                          | 15                          |
| Friends                            | 2                          | 6                           | Walk                               | 5                          | 15                          |
| Me                                 | 2                          | 6                           | Run                                | 5                          | 15                          |
|                                    |                            |                             | Clap                               | 5                          | 15                          |

| Lesson 6                            |                            |                             |                                    |                            |                             |
|-------------------------------------|----------------------------|-----------------------------|------------------------------------|----------------------------|-----------------------------|
| Let's Make a Sandwich               |                            |                             | Are You Hungry?                    |                            |                             |
| Vocabulary Item<br>( <i>n</i> = 13) | Total Number<br>(per song) | Total Number<br>(per video) | Vocabulary Item<br>( <i>n</i> = 8) | Total Number<br>(per song) | Total Number<br>(per video) |
| Make/Do                             | 13                         | 39                          | You                                | 12                         | 36                          |
| Sandwich                            | 13                         | 39                          | Hungry                             | 4                          | 12                          |
| You                                 | 3                          | 9                           | Yes                                | 24                         | 72                          |
| Me/I                                | 5                          | 15                          | Like                               | 8                          | 24                          |
| Hungry                              | 2                          | 6                           | Bananas                            | 2                          | 6                           |
| Bread                               | 2                          | 6                           | Apples                             | 2                          | 6                           |
| Want                                | 4                          | 12                          | Oranges                            | 2                          | 6                           |
| Butter                              | 2                          | 6                           | Grapes                             | 2                          | 6                           |
| Egg                                 | 2                          | 6                           |                                    |                            |                             |
| Chicken                             | 2                          | 6                           |                                    |                            |                             |
| Tomato                              | 1                          | 3                           |                                    |                            |                             |
| Please                              | 1                          | 3                           |                                    |                            |                             |
| Cheese                              | 1                          | 3                           |                                    |                            |                             |

| Lesson 7                            |                            |                             |                                     |                            |                             |
|-------------------------------------|----------------------------|-----------------------------|-------------------------------------|----------------------------|-----------------------------|
| Teddy Bear is Sick Today            |                            |                             | Can I have?                         |                            |                             |
| Vocabulary Item<br>( <i>n</i> = 15) | Total Number<br>(per song) | Total Number<br>(per video) | Vocabulary Item<br>( <i>n</i> = 17) | Total Number<br>(per song) | Total Number<br>(per video) |
| Teddy Bear                          | 6                          | 18                          | I                                   | 3                          | 9                           |
| Sick                                | 6                          | 18                          | Hungry                              | 3                          | 9                           |
| Today                               | 6                          | 18                          | Have                                | 10                         | 30                          |
| What                                | 3                          | 9                           | Food                                | 1                          | 3                           |
| Say                                 | 3                          | 9                           | Eat                                 | 6                          | 18                          |
| Call                                | 4                          | 12                          | Biscuit                             | 7                          | 21                          |
| Doctor                              | 3                          | 9                           | Box                                 | 1                          | 3                           |
| Home                                | 1                          | 3                           | Go                                  | 3                          | 9                           |
| Good                                | 3                          | 9                           | Bed                                 | 3                          | 9                           |
| Get                                 | 4                          | 12                          | Drink                               | 7                          | 21                          |
| Medicine                            | 3                          | 9                           | Little                              | 2                          | 6                           |
| Shop                                | 1                          | 3                           | Milk                                | 2                          | 6                           |
| Give                                | 3                          | 9                           | Juice                               | 3                          | 9                           |
| Kiss                                | 3                          | 9                           | Glass                               | 2                          | 6                           |
| Do                                  | 1                          | 3                           | Yes                                 | 3                          | 9                           |
|                                     |                            |                             | Brush Teeth                         | 3                          | 9                           |
|                                     |                            |                             | Night, night                        | 3                          | 9                           |

| Lesson 8                            |                            |                             |                                     |                            |                             |
|-------------------------------------|----------------------------|-----------------------------|-------------------------------------|----------------------------|-----------------------------|
| What is the Weather?                |                            |                             | How's the Weather?                  |                            |                             |
| Vocabulary Item<br>( <i>n</i> = 12) | Total Number<br>(per song) | Total Number<br>(per video) | Vocabulary Item<br>( <i>n</i> = 11) | Total Number<br>(per song) | Total Number<br>(per video) |
| What                                | 7                          | 21                          | Weather                             | 2                          | 6                           |
| Weather                             | 7                          | 21                          | Look                                | 8                          | 24                          |
| Today                               | 4                          | 8                           | Outside                             | 11                         | 33                          |
| Sunny                               | 9                          | 27                          | Sunny                               | 2                          | 6                           |
| Raining                             | 2                          | 6                           | Yes                                 | 4                          | 12                          |
| Nice                                | 2                          | 6                           | Play                                | 2                          | 6                           |
| Day                                 | 3                          | 9                           | Raining                             | 2                          | 6                           |
| Hot                                 | 1                          | 3                           | Inside                              | 1                          | 3                           |
| Sea                                 | 1                          | 3                           | Cold                                | 4                          | 12                          |
| Go                                  | 1                          | 3                           | Go                                  | 2                          | 6                           |
| Play                                | 1                          | 3                           | Snowing                             | 2                          | 6                           |
| Me                                  | 1                          | 3                           |                                     |                            |                             |



| Lesson 9                           |                            |                             |                                     |                            |                             |                                     |                            |                             |                                    |                            |                             |
|------------------------------------|----------------------------|-----------------------------|-------------------------------------|----------------------------|-----------------------------|-------------------------------------|----------------------------|-----------------------------|------------------------------------|----------------------------|-----------------------------|
| Baby Shark                         |                            |                             | The Wheels on the Bus               |                            |                             | This is the Way We                  |                            |                             | Goodnight Baby Shark               |                            |                             |
| Vocabulary Item<br>( <i>n</i> = 5) | Total Number<br>(per song) | Total Number<br>(per video) | Vocabulary Item<br>( <i>n</i> = 15) | Total Number<br>(per song) | Total Number<br>(per video) | Vocabulary Item<br>( <i>n</i> = 11) | Total Number<br>(per song) | Total Number<br>(per video) | Vocabulary Item<br>( <i>n</i> = 7) | Total Number<br>(per song) | Total Number<br>(per video) |
| Baby                               | 8                          | 16                          | Bus                                 | 14                         | 28                          | Bath                                | 4                          | 8                           | Bath                               | 4                          | 8                           |
| Mommy                              | 4                          | 8                           | Day                                 | 7                          | 14                          | Sleep                               | 7                          | 14                          | Brush Teeth                        | 4                          | 8                           |
| Daddy                              | 4                          | 8                           | Baby                                | 2                          | 4                           | Wash                                | 4                          | 8                           | Go                                 | 4                          | 8                           |
| Granny                             | 4                          | 8                           | Crying<br>(wa, wa, wa)              | 4                          | 8                           | Hair                                | 4                          | 8                           | Bed                                | 4                          | 8                           |
| Grandad                            | 4                          | 8                           | Mommy                               | 2                          | 4                           | Dry                                 | 4                          | 8                           | Book                               | 4                          | 8                           |
|                                    |                            |                             | Shh                                 | 4                          | 8                           | Nappy                               | 4                          | 8                           | Read                               | 4                          | 8                           |
|                                    |                            |                             | Daddy                               | 2                          | 4                           | Brush Teeth                         | 4                          | 8                           | Sleep                              | 4                          | 8                           |
|                                    |                            |                             | Sleep                               | 4                          | 8                           | Read                                | 4                          | 8                           |                                    |                            |                             |
|                                    |                            |                             | Money                               | 4                          | 8                           | Book                                | 4                          | 8                           |                                    |                            |                             |
|                                    |                            |                             | Please                              | 4                          | 8                           | Say                                 | 4                          | 8                           |                                    |                            |                             |
|                                    |                            |                             | Doors                               | 2                          | 4                           | Night, night                        | 4                          | 8                           |                                    |                            |                             |
|                                    |                            |                             | Open                                | 4                          | 8                           |                                     |                            |                             |                                    |                            |                             |
|                                    |                            |                             | Close                               | 4                          | 8                           |                                     |                            |                             |                                    |                            |                             |
|                                    |                            |                             | People                              | 2                          | 4                           |                                     |                            |                             |                                    |                            |                             |
|                                    |                            |                             | Up                                  | 4                          | 8                           |                                     |                            |                             |                                    |                            |                             |
|                                    |                            |                             | Down                                | 4                          | 8                           |                                     |                            |                             |                                    |                            |                             |

[illegible]

| Lesson 11                          |                            |                             |                                    |                            |                             |                                     |                            |                             |                                     |                            |                             |
|------------------------------------|----------------------------|-----------------------------|------------------------------------|----------------------------|-----------------------------|-------------------------------------|----------------------------|-----------------------------|-------------------------------------|----------------------------|-----------------------------|
| Can You Roll the Big Ball?         |                            |                             | Teddy Bear is Quiet                |                            |                             | Teddy Bear is Sick Today            |                            |                             | Can I have?                         |                            |                             |
| Vocabulary Item<br>( <i>n</i> = 8) | Total Number<br>(per song) | Total Number<br>(per video) | Vocabulary Item<br>( <i>n</i> = 9) | Total Number<br>(per song) | Total Number<br>(per video) | Vocabulary Item<br>( <i>n</i> = 15) | Total Number<br>(per song) | Total Number<br>(per video) | Vocabulary Item<br>( <i>n</i> = 17) | Total Number<br>(per song) | Total Number<br>(per video) |
| Come                               | 18                         | 36                          | Teddy Bear                         | 12                         | 24                          | Teddy bear                          | 6                          | 12                          | I                                   | 3                          | 6                           |
| Roll                               | 26                         | 52                          | Quiet                              | 12                         | 24                          | Sick                                | 6                          | 12                          | Hungry                              | 3                          | 6                           |
| Big                                | 18                         | 36                          | You                                | 4                          | 8                           | Today                               | 6                          | 12                          | Have                                | 10                         | 20                          |
| Ball                               | 18                         | 36                          | What                               | 4                          | 8                           | What                                | 3                          | 6                           | Food                                | 1                          | 2                           |
| Daddy                              | 2                          | 4                           | Do                                 | 4                          | 8                           | Say                                 | 3                          | 6                           | Eat                                 | 6                          | 12                          |
| Mommy                              | 2                          | 4                           | Jump                               | 5                          | 10                          | Call                                | 4                          | 8                           | Biscuit                             | 7                          | 14                          |
| Friends                            | 2                          | 4                           | Walk                               | 5                          | 10                          | Doctor                              | 3                          | 6                           | Box                                 | 1                          | 2                           |
| Me                                 | 2                          | 4                           | Run                                | 5                          | 10                          | Home                                | 1                          | 2                           | Go                                  | 3                          | 6                           |
|                                    |                            |                             | Clap                               | 5                          | 10                          | Good                                | 3                          | 6                           | Bed                                 | 3                          | 6                           |
|                                    |                            |                             |                                    |                            |                             | Get                                 | 4                          | 8                           | Drink                               | 7                          | 14                          |
|                                    |                            |                             |                                    |                            |                             | Medicine                            | 3                          | 6                           | Little                              | 2                          | 4                           |
|                                    |                            |                             |                                    |                            |                             | Shop                                | 1                          | 2                           | Milk                                | 2                          | 4                           |
|                                    |                            |                             |                                    |                            |                             | Give                                | 3                          | 6                           | Juice                               | 3                          | 6                           |
|                                    |                            |                             |                                    |                            |                             | Kiss                                | 3                          | 6                           | Glass                               | 2                          | 4                           |
|                                    |                            |                             |                                    |                            |                             | Do                                  | 1                          | 2                           | Yes                                 | 3                          | 6                           |
|                                    |                            |                             |                                    |                            |                             |                                     |                            |                             | Brush Teeth                         | 3                          | 6                           |
|                                    |                            |                             |                                    |                            |                             |                                     |                            |                             | Night, night                        | 3                          | 6                           |
